# Supplementary material for: Predicting Malnutrition Risk with Data from Routinely Measured Clinical Biochemical Diagnostic Tests in Free-Living Older Populations
Source: MDPI journal article supplement (doi:10.3390/nu13061883), 2021-05-31
Supplement: s1 [file s1]

## Supplementary tables

| Supplementary Table S1. NDNS methodology of variables included for analyses with self-computed categories |                                                                                                                                                                                                                                                                                                                                                                                     |                                                                                                             |
|-----------------------------------------------------------------------------------------------------------|-------------------------------------------------------------------------------------------------------------------------------------------------------------------------------------------------------------------------------------------------------------------------------------------------------------------------------------------------------------------------------------|-------------------------------------------------------------------------------------------------------------|
| Variable (unit)                                                                                           | Exact measurement                                                                                                                                                                                                                                                                                                                                                                   | Computed categories                                                                                         |
| <b>Interviewer visit</b>                                                                                  |                                                                                                                                                                                                                                                                                                                                                                                     |                                                                                                             |
| Sex                                                                                                       | Ask or record sex of subject                                                                                                                                                                                                                                                                                                                                                        | Male, female                                                                                                |
| Age (years)                                                                                               | Q: What is your date of birth?<br>If day not given, enter 15 for day.<br>If month not given, enter 6 for month.                                                                                                                                                                                                                                                                     | 50 – 59, 60 – 69, ≥ 70                                                                                      |
| Marital status                                                                                            | Ask or record marital status<br>Q: Are you ...<br>Single, that is, never married<br>Married and living with your husband/wife<br>Civil partner in a legally recognised Civil Partnership<br>Married and separated from your husband/wife<br>Divorced<br>Widowed                                                                                                                     | Single (never married), married or legally recognised civil partnership, divorced or widowed                |
| Qualification gained                                                                                      | Q: Do you have any qualifications from school, college or university, or any qualifications connected with work or from government schemes?<br>If yes, Q: Tell me whether you have any of the qualifications listed. Start at the top of the list and tell me the first one you come to that you passed ( <i>47 answer options</i> )                                                | Secondary education or less, further education, higher education, other                                     |
| Region                                                                                                    | Record region of interview visit                                                                                                                                                                                                                                                                                                                                                    | England: North, England: Central/Midlands, England: South (incl. London), Scotland, Wales, Northern Ireland |
| Ethnicity                                                                                                 | Q: To which of these ethnic groups do you consider you belong? ( <i>15 answer options</i> )                                                                                                                                                                                                                                                                                         | White British, non-white                                                                                    |
| Self-assessed general health                                                                              | Q: How is your health in general? Would you say it was... very good, good, fair, bad, or very bad?                                                                                                                                                                                                                                                                                  | Good, fair, bad                                                                                             |
| Presence of longstanding illness                                                                          | Year 1 – 5: Q: Do you have any long-standing illness, disability or infirmity? By long-standing illness I mean anything that has troubled you over a period of time, or that is likely to affect you over a period of time?<br>Year 6 – 9: Q: Do you have any physical or mental health condition(s) or illnesses that have lasted, or are expected to last, for 12 months or more? | Yes, no                                                                                                     |
| Any dietary supplement use in the past year                                                               | Check record of taking any supplements in diary<br>Q: Have you taken any vitamins, minerals, fish oil, fibre or other dietary supplements of the type listed on this card in the past year, including prescription and non-prescription supplements?                                                                                                                                | Yes, no                                                                                                     |
| Appetite                                                                                                  | Year 1-5, Q: How would you describe your appetite? Do you have ... a good appetite, an average appetite or a poor appetite for someone your age?                                                                                                                                                                                                                                    | Good, average, poor                                                                                         |
| Any of own teeth                                                                                          | Q: Do you have any of your own, natural, teeth?                                                                                                                                                                                                                                                                                                                                     | Yes, no                                                                                                     |
| Cigarette smoking status                                                                                  | Q: Have you ever smoked cigarettes regularly?<br>Yes, regularly, that is at least one cigarette a day.<br>No, only occasionally<br>Or no, never really smoked cigarettes, just tried them out once or twice.<br>If yes, Q: How long ago did you stop smoking cigarettes regularly?<br>Additional self-completion smoking questionnaire                                              | Never, former, current                                                                                      |
| Height (cm)                                                                                               | Portable stadiometer                                                                                                                                                                                                                                                                                                                                                                | -                                                                                                           |
| Weight (kg)                                                                                               | Weighing scales                                                                                                                                                                                                                                                                                                                                                                     | -                                                                                                           |
| Body Mass Index (kg/m <sup>2</sup> )                                                                      | Calculated: Weight (kg) / height squared (m <sup>2</sup> )                                                                                                                                                                                                                                                                                                                          | -                                                                                                           |

| <b>Nurse visit</b>                                                 |                                                                                                                                                                                                                                                                                                                                     |                                                   |
|--------------------------------------------------------------------|-------------------------------------------------------------------------------------------------------------------------------------------------------------------------------------------------------------------------------------------------------------------------------------------------------------------------------------|---------------------------------------------------|
| Medication use                                                     | <p>Q: Are you taking or using any medicines, pills, syrups, ointments, puffers or injections prescribed for you by a doctor or a nurse? (dietary supplements included as long as prescribed)</p> <p>If yes, Q: Can I see the containers for all prescribed medicines currently being taken?</p> <p>Number of medicines derived.</p> | No medication, 1-4 medicines, 5 or more medicines |
| <b>Micronutrient assays</b>                                        |                                                                                                                                                                                                                                                                                                                                     |                                                   |
| Plasma vitamin C (µmol/L)                                          | Based on the Vuileumier and Keck procedure [73], performed on the BMG Labtech FLUOstar OPTIMA plate reader measuring fluorescence.                                                                                                                                                                                                  | -                                                 |
| Plasma vitamin B <sub>6</sub> pyridoxal-5-phosphate (PLP) (nmol/L) | Reverse-phase high performance liquid chromatography (HPLC) method with post column derivatisation and fluorimetric detection.                                                                                                                                                                                                      | -                                                 |
| Serum vitamin B <sub>12</sub> (pmol/L)                             | ADVIA Centaur B <sub>12</sub> assay using direct chemiluminescence with a releasing agent (sodium hydroxide) and dithiothreitol (DTT) to release the B <sub>12</sub> from the endogenous binding proteins in the sample.                                                                                                            | -                                                 |
| Plasma selenium / zinc (µmol/L)                                    | <sup>78</sup> Se / <sup>68</sup> Zn isotope measurement using an inductively coupled plasma mass spectrometer (IPS-MS) equipped with a dynamic reaction cell (DRC).                                                                                                                                                                 | -                                                 |

**Supplementary Table S2. Characteristics of study population according to micronutrient deficiency biomarker status (vitamin B<sub>6</sub> PLP, vitamin B<sub>12</sub>, vitamin C, selenium, zinc) (n = 1518)**

| Characteristic                                   | No<br>micronutrient<br>deficiencies<br>(n = 789) | 1<br>micronutrient<br>deficiency<br>(n = 443) | 2<br>micronutrient<br>deficiencies<br>(n = 286) | p value <sup>1</sup> |
|--------------------------------------------------|--------------------------------------------------|-----------------------------------------------|-------------------------------------------------|----------------------|
| Sex, <i>women</i>                                | 462 (58.6)                                       | 250 (56.4)                                    | 156 (54.6)                                      | 0.467                |
| Age group                                        |                                                  |                                               |                                                 | <0.001               |
| 50–59 years                                      | 353 (44.7)                                       | 157 (35.4)                                    | 66 (23.1)                                       |                      |
| 60–69 years                                      | 267 (33.8)                                       | 154 (34.8)                                    | 101 (35.3)                                      |                      |
| ≥70 years                                        | 169 (21.4)                                       | 132 (29.8)                                    | 119 (41.6)                                      |                      |
| Ethnic group, <i>white British</i>               | 759 (96.2)                                       | 427 (96.4)                                    | 281 (98.3)                                      | 0.417                |
| Region                                           |                                                  |                                               |                                                 | <0.001               |
| England: North                                   | 153 (19.4)                                       | 81 (18.3)                                     | 59 (20.6)                                       |                      |
| England: Central/Midlands                        | 102 (12.9)                                       | 53 (12.0)                                     | 22 (7.7)                                        |                      |
| England: South                                   | 271 (34.4)                                       | 115 (26.0)                                    | 69 (24.1)                                       |                      |
| Scotland                                         | 113 (14.3)                                       | 80 (18.1)                                     | 48 (16.8)                                       |                      |
| Wales                                            | 96 (12.2)                                        | 83 (18.7)                                     | 68 (23.8)                                       |                      |
| Northern Ireland                                 | 54 (6.8)                                         | 31 (7.0)                                      | 20 (7.0)                                        |                      |
| Qualification                                    |                                                  |                                               |                                                 | <0.001               |
| Secondary education or less                      | 336 (42.6)                                       | 237 (53.5)                                    | 178 (62.2)                                      |                      |
| Further education                                | 105 (13.3)                                       | 62 (14.0)                                     | 29 (10.1)                                       |                      |
| Higher education                                 | 309 (39.2)                                       | 114 (25.7)                                    | 58 (20.3)                                       |                      |
| Other                                            | 39 (4.9)                                         | 30 (6.8)                                      | 21 (7.3)                                        |                      |
| Marital status                                   |                                                  |                                               |                                                 | <0.001               |
| Single, never married                            | 81 (10.3)                                        | 34 (7.7)                                      | 23 (8.0)                                        |                      |
| Married or partnership                           | 495 (62.7)                                       | 258 (58.2)                                    | 134 (46.9)                                      |                      |
| Divorced or widowed                              | 213 (27.0)                                       | 151 (34.1)                                    | 129 (45.1)                                      |                      |
| Smoking status (cigarettes)                      |                                                  |                                               |                                                 | <0.001               |
| Never smoker                                     | 483 (61.2)                                       | 222 (50.1)                                    | 127 (44.4)                                      |                      |
| Former smoker                                    | 251 (31.8)                                       | 143 (32.3)                                    | 91 (31.8)                                       |                      |
| Current smoker                                   | 55 (7.0)                                         | 78 (17.6)                                     | 68 (23.8)                                       |                      |
| Self-assessed general health                     |                                                  |                                               |                                                 | <0.001               |
| Good                                             | 654 (82.9)                                       | 311 (70.2)                                    | 155 (54.2)                                      |                      |
| Fair                                             | 122 (15.5)                                       | 102 (23.0)                                    | 102 (21.5)                                      |                      |
| Bad                                              | 13 (1.7)                                         | 30 (6.8)                                      | 29 (10.1)                                       |                      |
| Has longstanding illness, <i>yes</i>             | 354 (44.9)                                       | 248 (56.0)                                    | 193 (67.5)                                      | <0.001               |
| Number of medicines                              |                                                  |                                               |                                                 | <0.001               |
| No medication                                    | 290 (36.8)                                       | 114 (25.7)                                    | 47 (16.4)                                       |                      |
| 1–4 medicines                                    | 389 (49.3)                                       | 206 (46.5)                                    | 113 (39.5)                                      |                      |
| 5 or more medicines                              | 110 (13.9)                                       | 123 (27.8)                                    | 126 (44.1)                                      |                      |
| Any dietary supplement use last year, <i>yes</i> | 386 (48.9)                                       | 146 (33.0)                                    | 83 (29.0)                                       | <0.001               |
| Any of own teeth, <i>yes</i>                     | 722 (91.5)                                       | 374 (84.4)                                    | 216 (75.5)                                      | <0.001               |
| Appetite                                         |                                                  |                                               |                                                 | <0.001               |
| Good                                             | 342 (43.4)                                       | 170 (38.4)                                    | 63 (22.0)                                       |                      |
| Average                                          | 132 (16.7)                                       | 80 (18.1)                                     | 54 (18.9)                                       |                      |
| Poor                                             | 7 (0.9)                                          | 18 (4.1)                                      | 24 (8.4)                                        |                      |
| N/A to survey year                               | 308 (39.0)                                       | 175 (39.5)                                    | 145 (50.7)                                      |                      |
| BMI (kg/m <sup>2</sup> ), mean ± SD <sup>2</sup> | 27.7 ± 4.6                                       | 28.7 ± 5.2                                    | 29.1 ± 5.9                                      | <0.001               |
| BMI (kg/m <sup>2</sup> )                         |                                                  |                                               |                                                 | <0.001               |
| ≥20 (age < 70 years) or ≥22 (age ≥ 70 years)     | 739 (93.7)                                       | 398 (89.8)                                    | 238 (83.2)                                      |                      |
| <20 (age < 70 years) or <22 (age ≥ 70 years)     | 23 (2.9)                                         | 12 (2.7)                                      | 18 (6.3)                                        |                      |
| Unknown                                          | 27 (3.4)                                         | 33 (7.5)                                      | 30 (10.5)                                       |                      |
| Protein intake (g)                               |                                                  |                                               |                                                 | <0.001               |
| ≥RNI                                             | 653 (82.8)                                       | 300 (67.7)                                    | 151 (51.8)                                      |                      |
| <RNI                                             | 115 (14.6)                                       | 114 (25.7)                                    | 113 (39.5)                                      |                      |

|                                                |            |            |            |        |
|------------------------------------------------|------------|------------|------------|--------|
| Unknown                                        | 21 (2.7)   | 29 (6.6)   | 22 (7.7)   |        |
| Energy intake (kcal)                           |            |            |            | 0.418  |
| ≥EAR                                           | 128 (16.2) | 60 (13.5)  | 41 (14.3)  |        |
| <EAR                                           | 661 (83.8) | 383 (86.5) | 245 (85.7) |        |
| Protein intake (g) and energy intake (kcal)    |            |            |            | <0.001 |
| ≥RNI and ≥EAR                                  | 126 (16.0) | 56 (12.6)  | 35 (12.2)  |        |
| <RNI and <EAR                                  | 115 (14.6) | 113 (25.5) | 110 (38.5) |        |
| Either <RNI or <EAR                            | 527 (66.8) | 245 (55.3) | 119 (41.6) |        |
| Unknown                                        | 21 (2.7)   | 29 (6.6)   | 22 (7.7)   |        |
| Fruit and vegetable intake <sup>3</sup>        |            |            |            |        |
| <5 portions (80 g)/day                         | 359 (45.5) | 147 (33.2) | 68 (23.8)  | <0.001 |
| <2 portions (80 g)/day                         | 66 (8.4)   | 81 (18.3)  | 75 (26.2)  | <0.001 |
| Fluid intake <sup>3</sup>                      |            |            |            |        |
| <1600 mL/day (women) and<br><2000 mL/day (men) | 438 (55.5) | 280 (63.2) | 190 (66.4) | 0.001  |
| <1250 mL/day                                   | 174 (22.1) | 113 (25.5) | 74 (25.9)  | 0.257  |
| <750 mL/day                                    | 21 (2.7)   | 14 (3.2)   | 9 (3.2)    | 0.849  |

Data are presented as number (%) or mean ± SD.

<sup>1</sup> Chi-square test for categorical variables and ANOVA test for continuous variables

<sup>2</sup> Based on 762 valid observations for no micronutrient deficiencies, 410 valid observations for one micronutrient deficiency and 256 valid observations for two micronutrient deficiencies.

<sup>3</sup> No unknown categories, remaining number (%) of subjects are ≥ the cut-off point

BMI Body Mass Index. RNI Recommended Nutrient Intake. EAR Estimated Average Requirement.

**Supplementary Table S3. Comparison of study population characteristics between subjects included for analyses (n = 1518) and the total population (n = 3284), in order to explore generalizability of the current study results**

| Characteristic                                   | Included for analysis<br>(n = 1518) | Total population<br>(n = 3284) |
|--------------------------------------------------|-------------------------------------|--------------------------------|
| Sex, <i>women</i>                                | 868 (57.2)                          | 1878 (57.2)                    |
| Age group                                        |                                     |                                |
| 50–59 years                                      | 576 (37.9)                          | 1171 (35.7)                    |
| 60–69 years                                      | 522 (34.4)                          | 1028 (31.3)                    |
| ≥70 years                                        | 420 (27.7)                          | 1085 (33.0)                    |
| Ethnic group, <i>white British</i>               | 1467 (96.6)                         | 3156 (96.1)                    |
| Region                                           |                                     |                                |
| England: North                                   | 293 (19.3)                          | 587 (17.9)                     |
| England: Central/Midlands                        | 177 (11.7)                          | 382 (11.6)                     |
| England: South                                   | 455 (30.0)                          | 910 (27.7)                     |
| Scotland                                         | 241 (15.9)                          | 520 (15.8)                     |
| Wales                                            | 247 (16.3)                          | 502 (15.3)                     |
| Northern Ireland                                 | 105 (6.9)                           | 383 (11.7)                     |
| Qualification                                    |                                     |                                |
| Secondary education or less                      | 751 (49.5)                          | 1846 (56.2)                    |
| Further education                                | 196 (12.9)                          | 353 (10.7)                     |
| Higher education                                 | 481 (31.7)                          | 880 (26.8)                     |
| Other                                            | 90 (5.9)                            | 205 (6.2)                      |
| Marital status                                   |                                     |                                |
| Single, never married                            | 138 (9.1)                           | 339 (10.3)                     |
| Married or partnership                           | 887 (58.4)                          | 1788 (54.4)                    |
| Divorced or widowed                              | 493 (32.5)                          | 1157 (35.2)                    |
| Smoking status (cigarettes)                      |                                     |                                |
| Never smoker                                     | 832 (54.8)                          | 1700 (51.8)                    |
| Former smoker                                    | 485 (32.0)                          | 1085 (33.0)                    |
| Current smoker                                   | 201 (13.2)                          | 499 (15.2)                     |
| Self-assessed general health <sup>1</sup>        |                                     |                                |
| Good                                             | 1120 (73.8)                         | 2213 (67.4)                    |
| Fair                                             | 326 (21.5)                          | 811 (24.7)                     |
| Bad                                              | 72 (4.7)                            | 249 (7.9)                      |
| Has longstanding illness, <i>yes</i>             | 795 (52.4)                          | 1861 (56.7)                    |
| Number of medicines                              |                                     |                                |
| No medication                                    | 451 (29.7)                          | 1464 (44.6)                    |
| 1–4 medicines                                    | 708 (46.6)                          | 1100 (33.5)                    |
| 5 or more medicines                              | 359 (23.7)                          | 720 (21.9)                     |
| Any dietary supplement use last year, <i>yes</i> | 615 (40.5)                          | 1201 (36.6)                    |
| Any of own teeth, <i>yes</i>                     | 1312 (86.4)                         | 2752 (83.8)                    |
| Appetite <sup>2</sup>                            |                                     |                                |
| Good                                             | 575 (37.9)                          | 1181 (36.0)                    |
| Average                                          | 266 (17.5)                          | 613 (18.7)                     |
| Poor                                             | 49 (3.2)                            | 134 (4.1)                      |
| N/A to survey year                               | 628 (41.4)                          | 1355 (41.3)                    |
| BMI (kg/m <sup>2</sup> ) <sup>3</sup>            | 28.2 ± 5.0                          | 28.5 ± 5.2                     |
| BMI (kg/m <sup>2</sup> )                         |                                     |                                |
| ≥20 (age < 70 years) or ≥22 (age ≥ 70 years)     | 1375 (90.6)                         | 2832 (85.4)                    |
| <20 (age < 70 years) or <22 (age ≥ 70 years)     | 53 (3.5)                            | 132 (4.0)                      |
| Unknown                                          | 90 (5.9)                            | 352 (10.6)                     |
| Protein intake (g)                               |                                     |                                |
| ≥RNI                                             | 1104 (72.7)                         | 2176 (66.3)                    |
| <RNI                                             | 342 (22.5)                          | 820 (25.0)                     |
| Unknown                                          | 72 (4.7)                            | 288 (8.8)                      |

|                                                |               |               |
|------------------------------------------------|---------------|---------------|
| Energy intake (kcal)                           |               |               |
| ≥EAR                                           | 229 (15.1)    | 453 (13.8)    |
| <EAR                                           | 1289 (84.9)   | 2831 (86.2)   |
| Protein intake (g) and energy intake (kcal)    |               |               |
| ≥RNI and ≥EAR                                  | 217 (14.3)    | 415 (12.6)    |
| <RNI and <EAR                                  | 338 (22.3)    | 811 (24.7)    |
| Either <RNI or <EAR                            | 891 (58.7)    | 1770 (53.9)   |
| Unknown                                        | 72 (4.7)      | 288 (8.8)     |
| Fruit and vegetable intake <sup>4</sup>        |               |               |
| <5 portions (80 g)/day                         | 944 (62.2)    | 2218 (67.5)   |
| <2 portions (80 g)/day                         | 222 (14.6)    | 626 (19.1)    |
| Fluid intake <sup>4</sup>                      |               |               |
| <1600 mL/day (women) and<br><2000 mL/day (men) | 908 (59.8)    | 2062 (62.8)   |
| <1250 mL/day                                   | 361 (23.8)    | 938 (28.6)    |
| <750 mL/day                                    | 44 (2.9)      | 157 (4.8)     |
| Haemoglobin (g/dL) <sup>5</sup>                | 13.8 ± 1.3    | 13.8 ± 1.3    |
| Total Cholesterol (mmol/L) <sup>6</sup>        | 5.28 ± 1.17   | 5.28 ± 1.18   |
| CRP (mg/L) <sup>7</sup>                        | 4.44 ± 6.63   | 4.55 ± 6.74   |
| HbA1c (%) <sup>8</sup>                         | 5.8 ± 0.8     | 5.8 ± 0.8     |
| Ferritin (µg/L) <sup>9</sup>                   | 118.1 ± 126.4 | 119.2 ± 127.9 |
| 25-Hydroxy Vitamin D (nmol/L) <sup>10</sup>    | 46.3 ± 21.9   | 46.2 ± 22.1   |

Data are presented as number (%) or mean ± SD.

<sup>1</sup> Frequencies of total population based on n = 3273

<sup>2</sup> Frequencies of total population based on n = 3283.

<sup>3</sup> Mean value based on n = 1428 and n = 2932

<sup>4</sup> No unknown categories, remaining number (%) of subjects are ≥ the cut-off point

<sup>5</sup> Mean value based on n = 1436 and n = 1663

<sup>6</sup> Mean value based on n = 1490 and n = 1709

<sup>7</sup> Mean value based on n = 1300 and n = 1497

<sup>8</sup> Mean value based on n = 1429 and n = 1656

<sup>9</sup> Mean value based on n = 1512 and n = 1699

<sup>10</sup> Mean value based on n = 1481 and n = 1654

BMI Body Mass Index. CRP C-Reactive Protein. HbA1c Haemoglobin A1C.

## Reference

- 73 Vuilleumier, J.; Keck, E. Fluorometric assay of vitamin C in biological materials using a centrifugal analyser with fluorescence attachment. *J. Micronutr. Anal.* **1989**, *34*, 599–626.
